# Supplementary figures and images for: Development of novel apoptosis-assisted lung tissue decellularization methods
Source: Royal Society of Chemistry journal article supplement (doi:10.1039/d1bm00032b), 2021-01-01

**Fresh**

**SB-10 Only**

**Price Method**

**Campto+SB10**

**Collagen I**

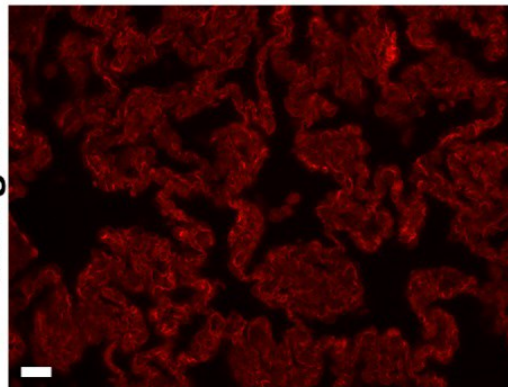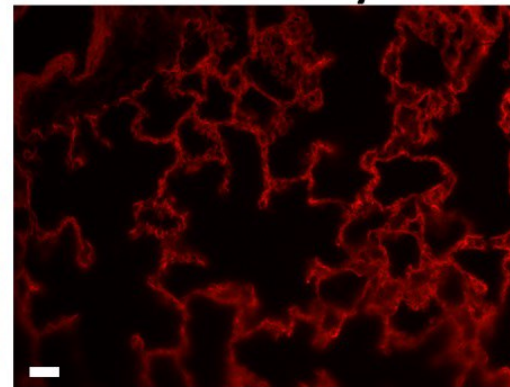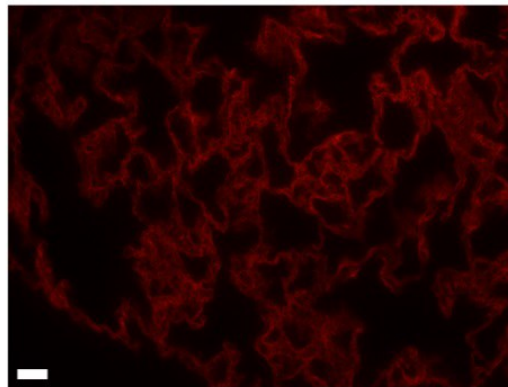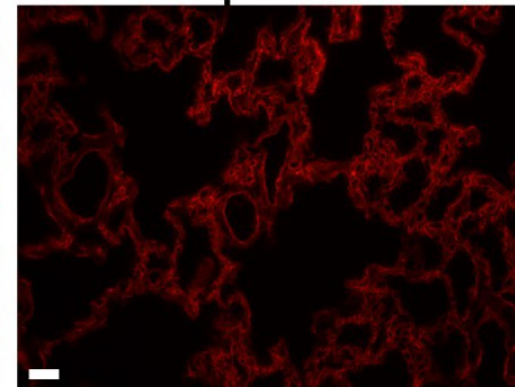

**Collagen IV**

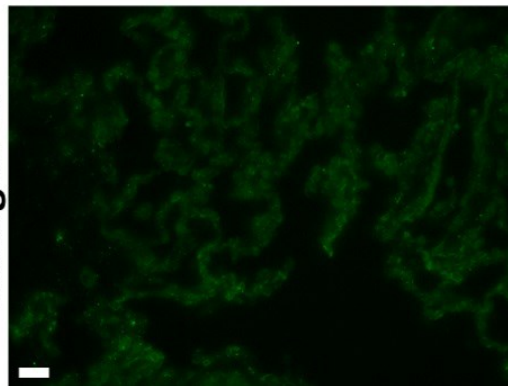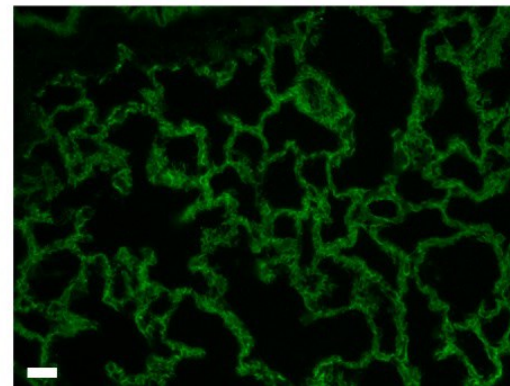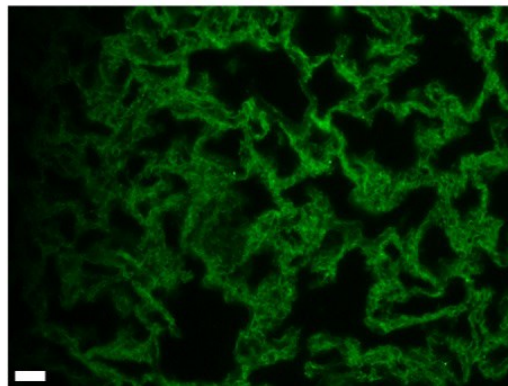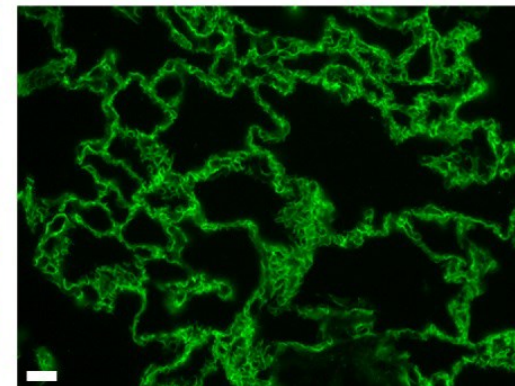

Supplement: d1bm00032b3.pdf [file d1bm00032b3.pdf]
